# Supplementary material for: sv-callers: a highly portable parallel workflow for structural variant detection in whole-genome sequence data
Source: PeerJ. 2020 Jan 6;8:e8214. doi: 10.7717/peerj.8214 (PMC6951283; doi:10.7717/peerj.8214)
Supplement: Supplemental Information 4 — Manta, DELLY, LUMPY, GRIDSS calls vs merged calls that agree by at least two or three callers (denoted as ’merge2+’ or ’merge3+’, respectively). [file peerj-08-8214-s004.xlsx]

## Sheet: Evaluation
Personalis/1kGP (n=2676)
callset	n	tp	fp	fn	precision	recall
Manta	9084	4444	4640	846	48.9	84
DELLY	12042	4514	7528	776	37.5	85.3
LUMPY	382	262	120	5028	68.6	5
GRIDSS	5386	4134	1252	1156	76.8	78.1
merge2+	5194	3652	1542	1638	70.3	69
merge3+	3660	3224	436	2066	88.1	60.9
PacBio/Moleculo (n=4095)
caller	n	tp	fp	fn	precision	recall
Manta	9084	4910	4174	2882	54.1	63
DELLY	19944	4724	15220	3068	23.7	60.6
LUMPY	348	284	64	7508	81.6	3.6
GRIDSS	7100	4166	2934	3626	58.7	53.5
merge2+	5152	3962	1190	3830	76.9	50.8
merge3+	3634	3444	190	4348	94.8	44.2
